# Supplementary material for: A carbon-coated spinel zinc cobaltate doped with manganese and nickel as a cathode material for aqueous zinc-ion batteries
Source: Royal Society of Chemistry journal article supplement (doi:10.1039/d1dt00686j), 2021-01-01
Supplement: d1dt00686j1.pdf [file d1dt00686j1.pdf]

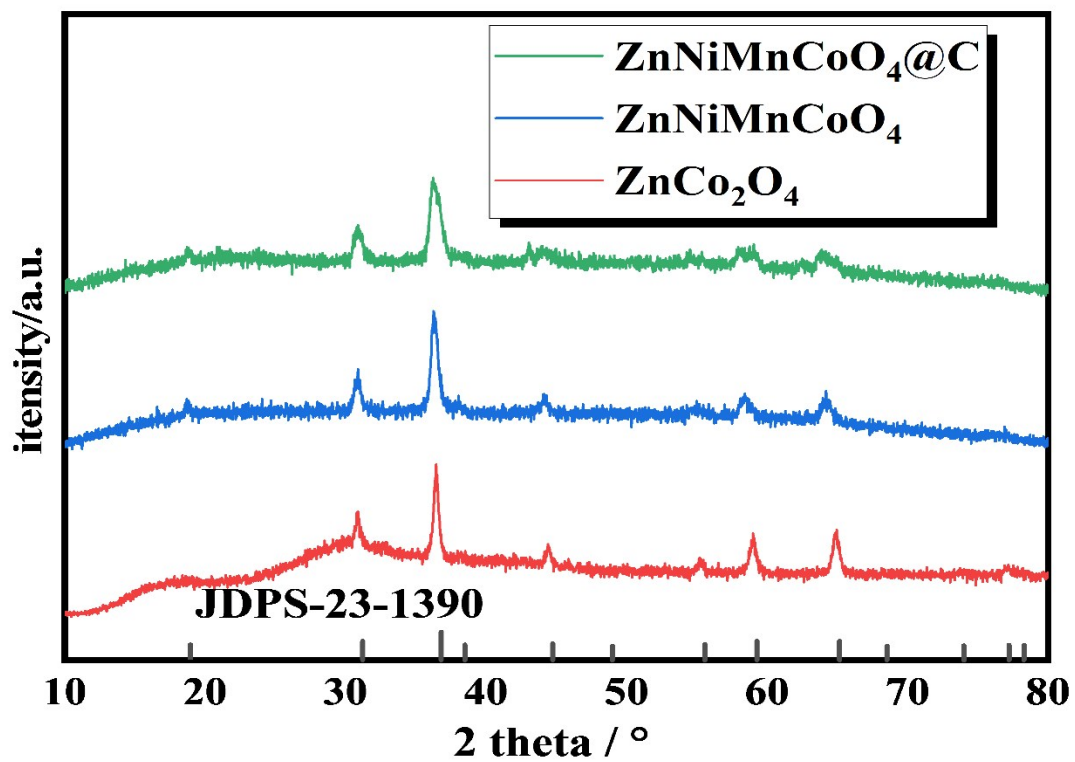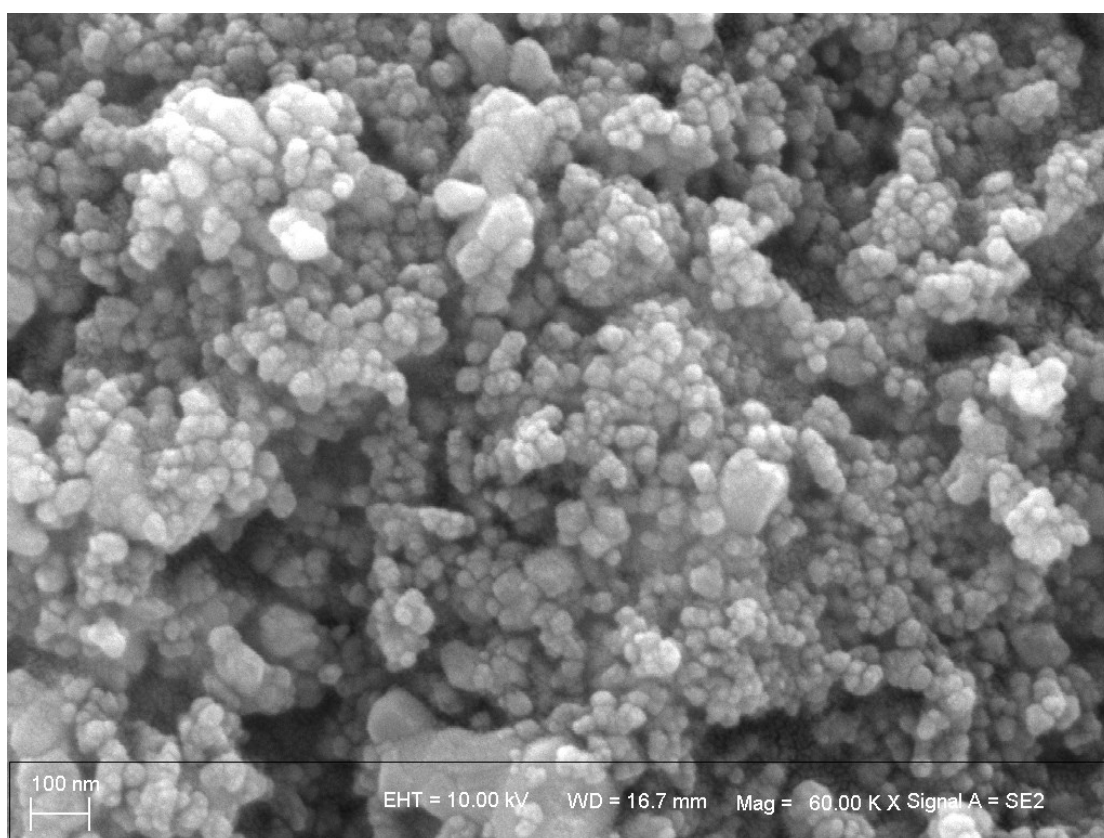

S1. XRD pattern of ZCO; ZNMC; ZNMC@C and Zinc cobaltate standard XRD

S2. SEM of ZNMC

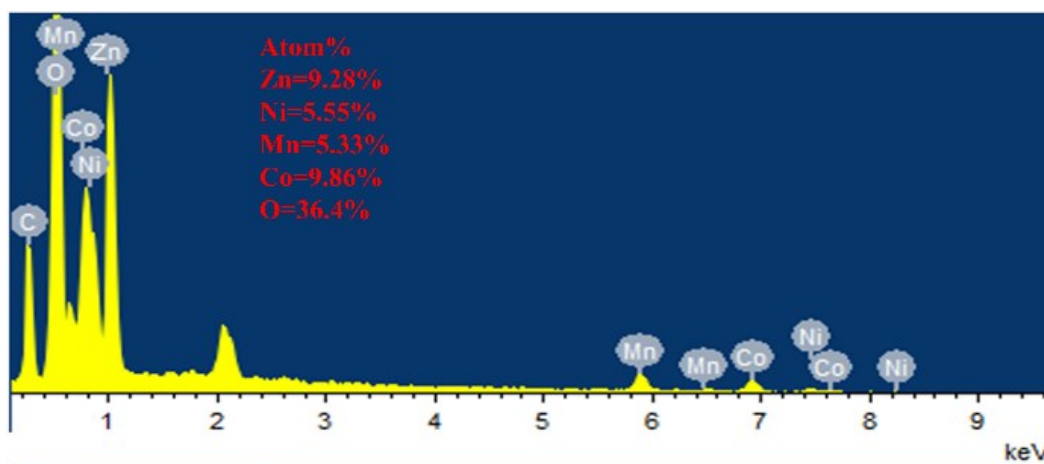

S3 Energy spectrum of ZNMC@C

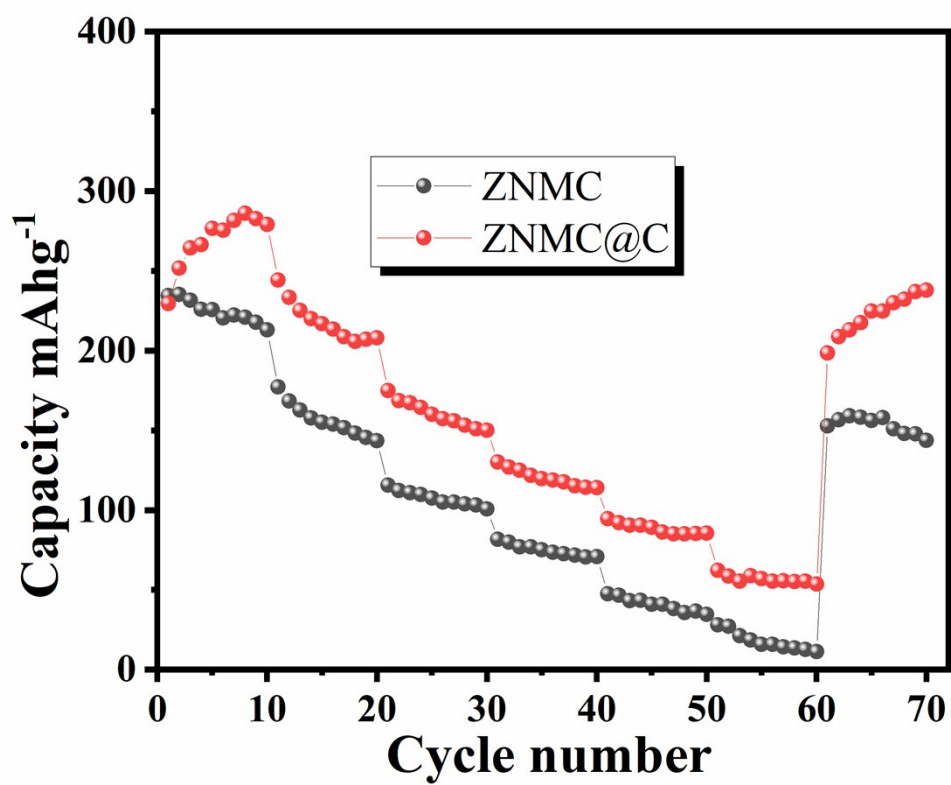

S4 ZNMC and ZNMC@C rate performance curve

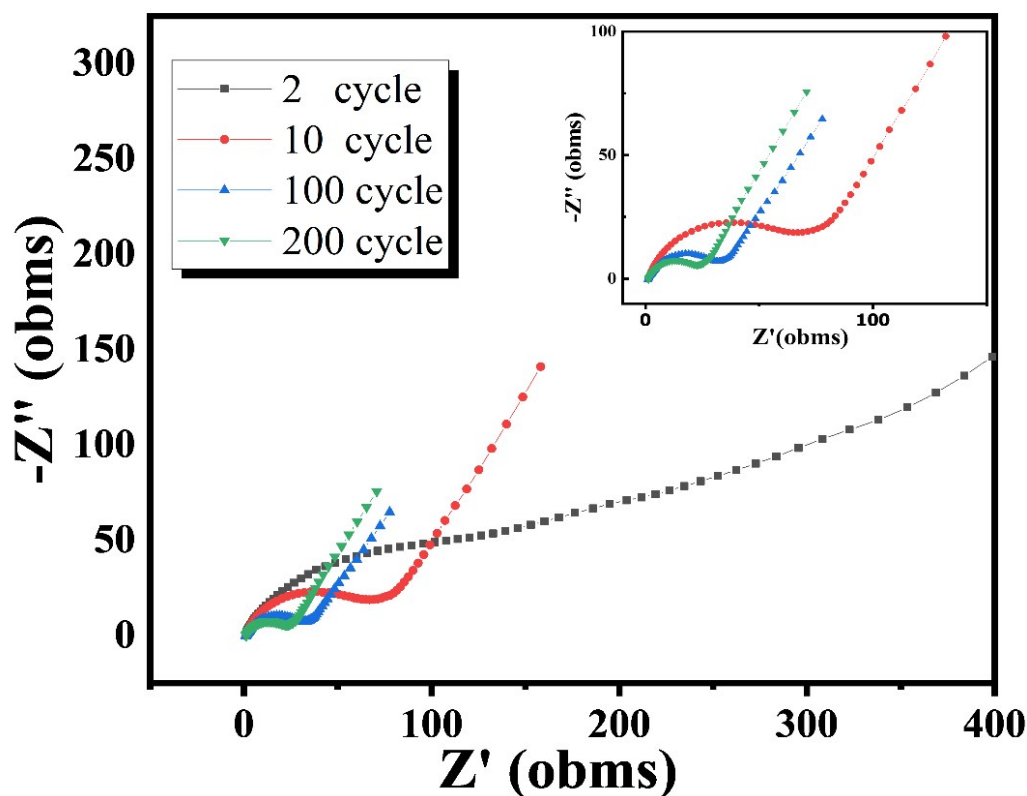

S5 Electrochemical impedance spectroscopy of ZNMC after 0,2, 10, 100, and 200 cycles of zinc ion battery (the inset is the partial enlarged diagram).

|           | Elt. | Valence state | Main peak position [eV] | Area  | Sate. position [eV] | Area  |
|-----------|------|---------------|-------------------------|-------|---------------------|-------|
| Charge    | Co   | 4+            | 779.7                   | 871.2 | 789.2               | 41.7  |
|           |      |               | 794.8                   | 388.4 | 804.2               | 58.7  |
|           | Ni   | 3+            | 855.2                   | 229.8 | 859.8               | 78.3  |
|           |      |               | 860.5                   | 101.3 | 877.8               | 33.3  |
|           | Ni   | 4+            | 855.0                   | 175.1 | 861.2               | 138.4 |
|           |      |               | 872.3                   | 62.5  | 877.1               | 32.8  |
| Mn        | 4+   | 643.4         | 191.4                   |       |                     |       |
|           |      |               | 654.7                   | 127.5 |                     |       |
| Discharge | Co   | 3+            | 779.5                   | 220.1 | 785.1               | 28.8  |
|           |      |               | 795.0                   | 81.8  | 804.4               | 25.2  |
|           | Co   | 4+            | 781.1                   | 114.3 | 785.4               | 20.2  |
|           |      |               | 796.2                   | 41.1  | 805.2               | 15.2  |
|           | Ni   | 2+            | 854.1                   | 246.8 | 861.0               | 182.8 |
|           |      |               | 872.3                   | 85.9  | 878.9               | 49.0  |
|           | Mn   | 4+            | 642.5                   | 374.2 |                     |       |
|           |      |               | 654.4                   | 175.8 |                     |       |

S4. Fitting parameters for Co 2p, Mn 2p and Ni 2p peaks

| Cycle number | ZNMC Rs ( $\Omega$ ) | ZNMC Rct ( $\Omega$ ) | ZNMC@C Rs ( $\Omega$ ) | ZNMC@C Rct ( $\Omega$ ) |
|--------------|----------------------|-----------------------|------------------------|-------------------------|
| 0            | 2.32                 | 1101                  | 2.273                  | 96.32                   |
| 2            | 1.4                  | 827                   | 2.048                  | 74.15                   |
| 10           | 1.21                 | 147                   | 1.989                  | 37.02                   |
| 100          | 1.19                 | 52.1                  | 1.86                   | 25.21                   |
| 200          | 1.136                | 32.4                  | 1.625                  | 20.46                   |

S5 Rs ( $\Omega$ ) and Rct ( $\Omega$ ) values on electrochemical impedance spectroscopy of ZNMC and ZNMC@C.
